# Supplementary material for: ezSingleCell: An integrated one-stop single-cell and spatial omics analysis platform for bench scientists
Source: Research Square preprint supplement (doi:10.21203/rs.3.rs-2699698/v1), 2023-03-23
Supplement: Supplementary file 1 [file fc0c46669fad587ca275041c.pdf]

# Web interface of ezSingleCell

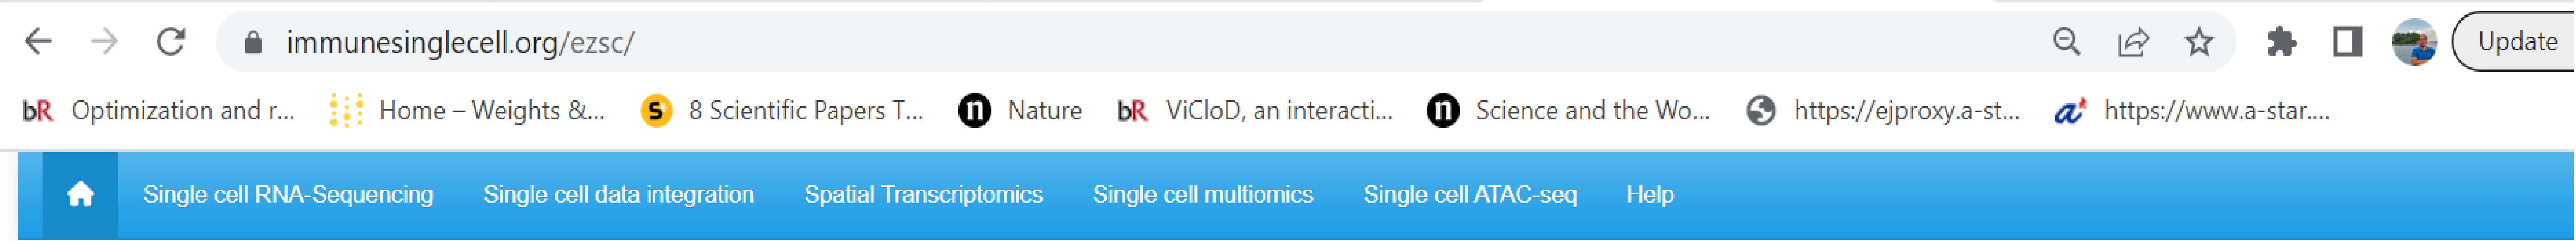

## ezSinglecell : An integrated one-stop single-cell and spatial analysis toolbox for bench scientists

**ezSingleCell** is an integrated one-stop single-cell and spatial analysis toolbox developed by Chen Jinmiao's lab with an intention to empower bench scientists to perform downstream Bioinformatics analysis. In the current version, we incorporate 5 modules : Single cell RNA-seq, Single cell Data Integration, Single cell Multiomics, Single Cell ATAC-seq and Spatial Transcriptomics.

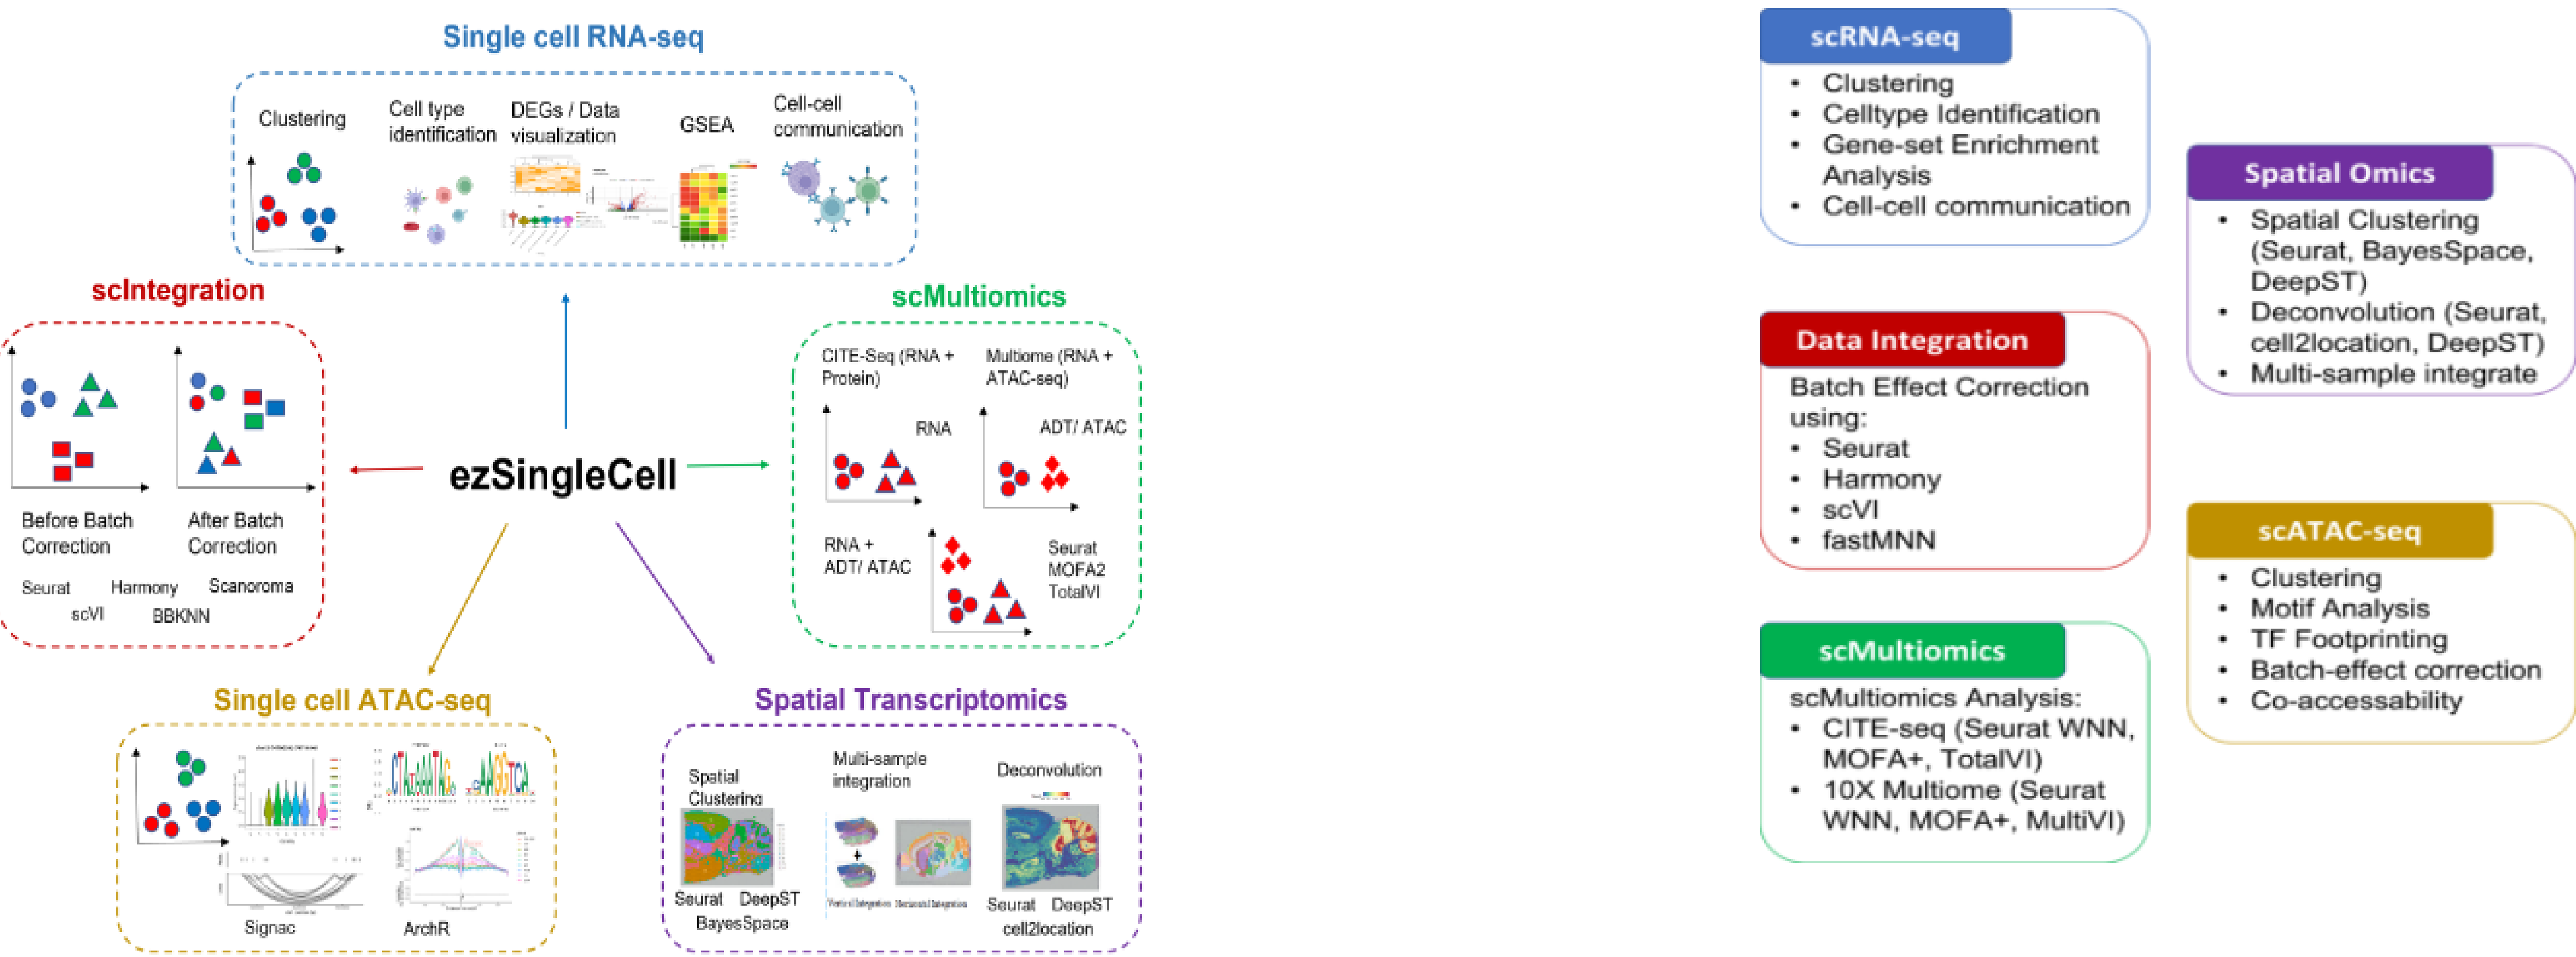

In this web server, we combine in-house novel algorithms such as CELLID (for cell type identification), along with existing top performing methods for both basic and advanced downstream analyses such as batch effect removal, trajectory, cell-cell communication, differential abundance, and spatial deconvolution.

The webserver is available at <https://immunesinglecell.org/ezsc/>
